# Supplementary material
Source: PubMed Central journal article supplement (PMC1446086)

Fig. S1

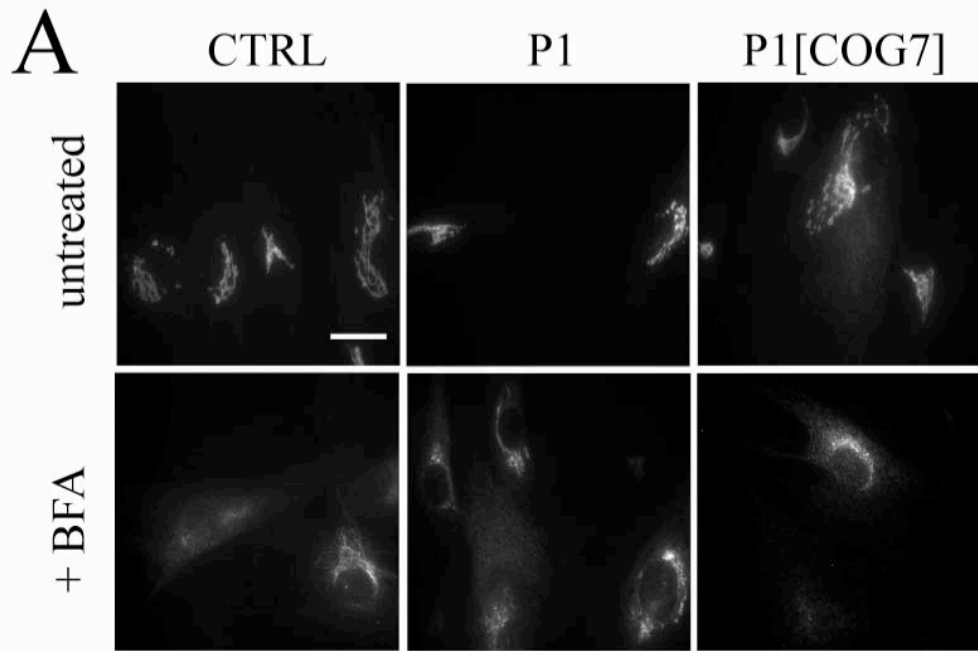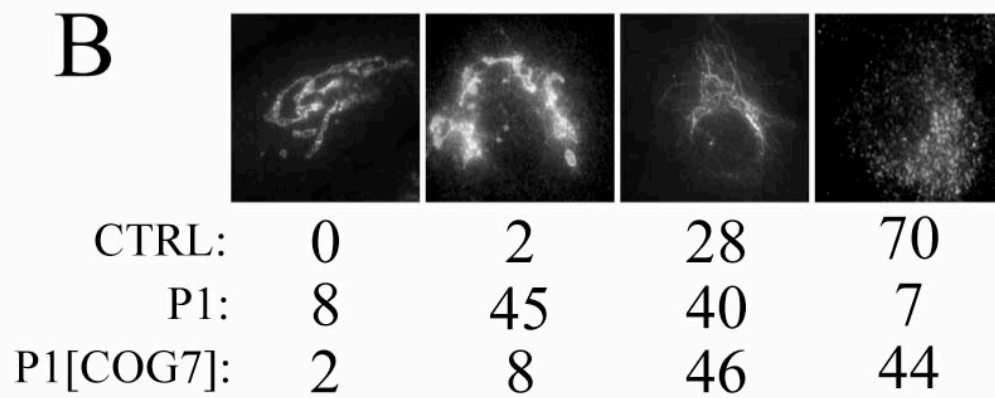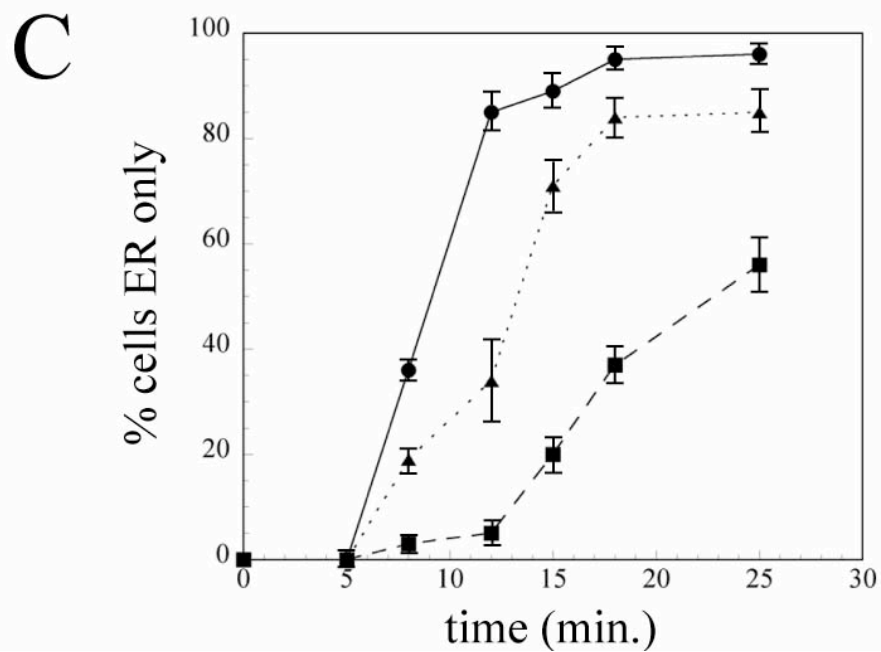

Supplement: mbc_E05-08-0822_1.pdf [file mbc_E05-08-0822_1.pdf]

Fig. S2

A

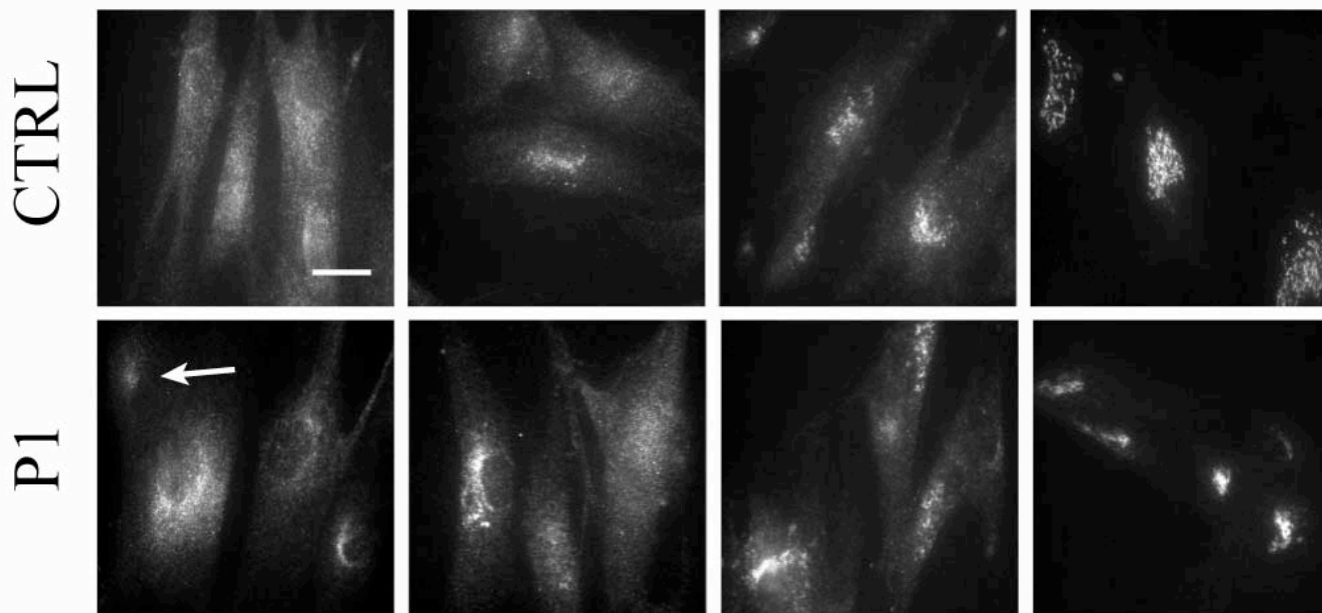

recovery time after  
BFA washout (h):

0

1

2.5

4

B

recovery  
time (h)

#1r

#2r

#3r

#4r

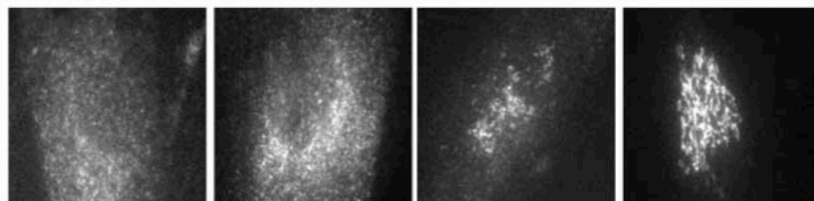

|     |       |                 |    |    |    |
|-----|-------|-----------------|----|----|----|
| 0   | CTRL: | 99              | 1  | 0  | 0  |
|     | P1:   | 95 <sup>a</sup> | 5  | 0  | 0  |
| 1   | CTRL: | 68              | 31 | 1  | 0  |
|     | P1:   | 62              | 35 | 3  | 0  |
| 2.5 | CTRL: | 13              | 18 | 69 | 0  |
|     | P1:   | 17              | 31 | 52 | 0  |
| 4   | CTRL: | 3               | 10 | 29 | 58 |
|     | P1:   | 9               | 22 | 22 | 47 |

Supplement: mbc_E05-08-0822_2.pdf [file mbc_E05-08-0822_2.pdf]

Fig. S3

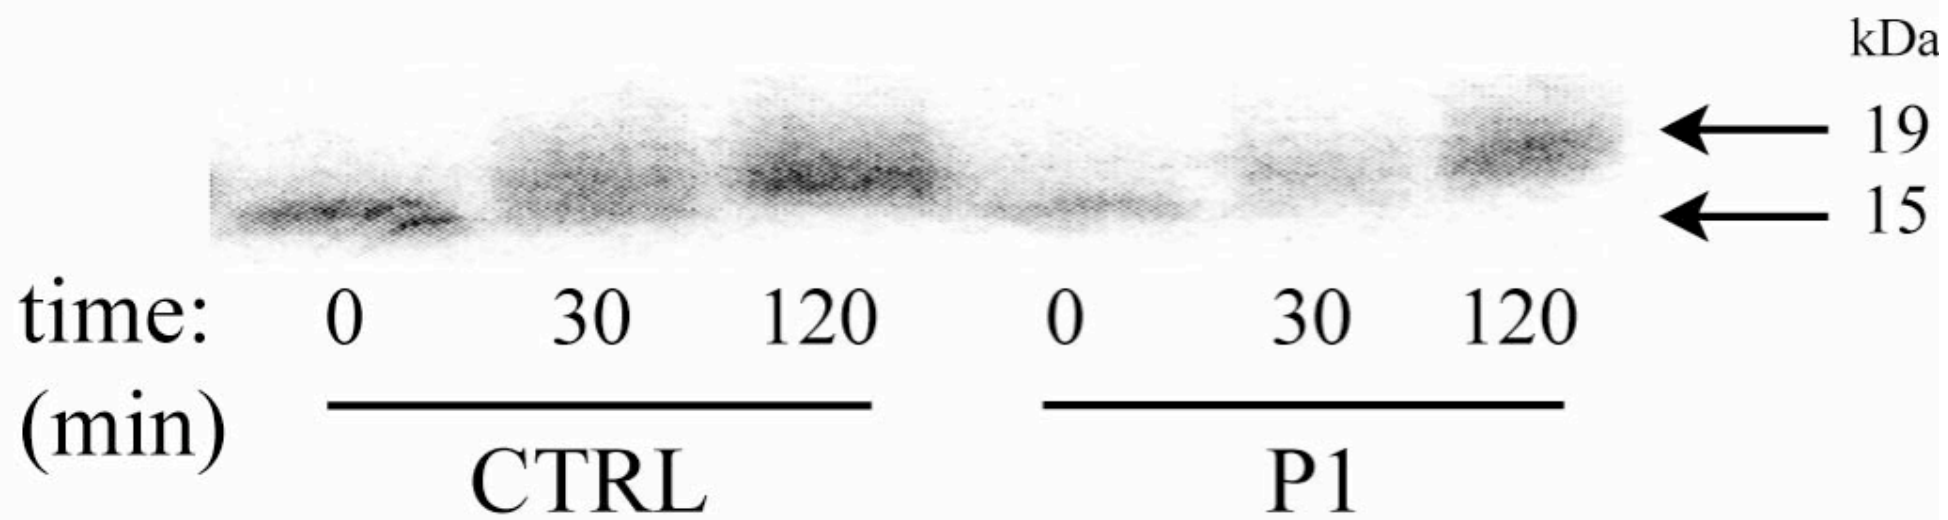

Supplement: mbc_E05-08-0822_3.pdf [file mbc_E05-08-0822_3.pdf]
